# Supplementary material
Source: Research Square preprint supplement (doi:10.21203/rs.3.rs-9496475/v1)
Supplement: Supplementary file 1 [file ee1347d57a14301061705705.docx]

**Appendix A. Supplementary data**

The following are the Supplementary data to this article:


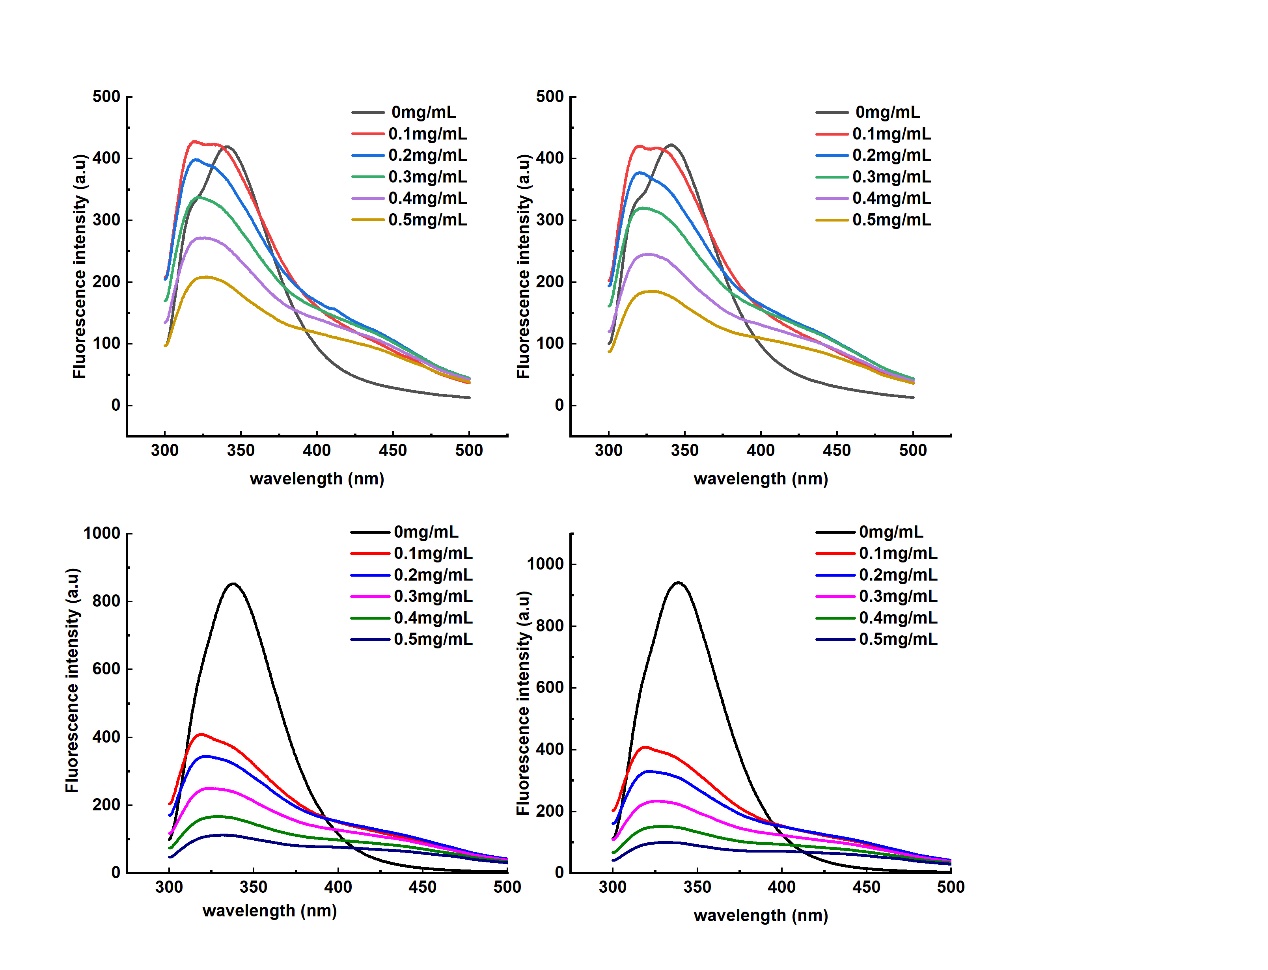


Figure S1. Fluorescence spectra of α-amylase (A: 298K, B: 310K) and α-glucosidase (C: 298K, B: 310K)

Table S1. Identification of acorn shells extract by HRLC-TOF-MS

| Compounds | Formula | Intensity | Expected m/z | Found at m/z | Error/ppm | Found RT/min | Isotope diff/% |
| --- | --- | --- | --- | --- | --- | --- | --- |
| Quinic Acid | C7H12O6 | 91475 | 191.0561 | 191.0559 | -1.2 | 0.79 | 1.70% |
| Gallic Acid | C7H6O5 | 26845 | 169.0143 | 169.0143 | 0 | 2.44 | 1.30% |
| Protocatechuic aldehyde | C7H6O3 | 36844 | 137.0244 | 137.0244 | -0.1 | 4.04 | 0.70% |
| Calycosin | C16H12O5 | 453 | 283.0612 | 283.0613 | 0.3 | 8.66 | 2.5% |
| p-counaric acid | C9H8O3 | 9102 | 163.0401 | 163.0401 | 0 | 4.89 | 2.10% |
| Ellagic Acid | C14H6O8 | 623416 | 300.999 | 300.9987 | -1 | 5.29 | 0.80% |
| Asiatic Acid | C30H48O5 | 333303 | 487.3429 | 487.3417 | -2.6 | 9.65 | 1.10% |
| Sclareol Glycol | C16H30O2 | 24806 | 253.2173 | 253.2173 | 0.2 | 11.59 | 2.0% |
| Myricetin | C15H10O8 | 9880 | 363.0347 | 363.0348 | 0.4 | 5.29 | 3.6% |
| Genistin | C21H20O10 | 6286 | 431.0984 | 431.0971 | -2.9 | 5 | 4.70% |
| Phloridzin | C21H24O10 | 5831 | 435.1297 | 435.1288 | -2 | 5.07 | 4.80% |
| Epicatechin gallate | C22H18O1 | 6054 | 487.0871 | 487.0892 | 4.3 | 4.52 | 9.5% |

|  | Extract (mg/mL) | Double reciprocal equation | Km | Vmax | Ki | Kis | Inhibition type |
| --- | --- | --- | --- | --- | --- | --- | --- |
| α-amylase | 0 | =151.32+11.514 | 13.1423 | 0.0869 | 0.62536 | 0.34406 | mixed inhibition |
| 0.2 | =268.84+30.055 | 8.9449 | 0.03327 |
| 0.5 | =298.53+34.764 | 8.5873 | 0.02877 |
| α-glucosidase | 0 | =0.6264+0.119 | 5.2639 | 8.4033 | 0.13624 | 0.04471 | mixed inhibition |
| 0.1 | =1.3576+0.6759 | 2.0086 | 1.4795 |
| 0.2 | =1.6527+0.8996 | 1.8372 | 1.1116 |

Table S2. Kinetic parameters of acorn shells extract on α-amylase and α-glucosidase
